# Supplementary material
Source: PubMed Central journal article supplement (PMC6420169)
Supplement: jiy609_suppl_table_s1.pdf [file jiy609_suppl_table_s1.pdf]

Protein ID  
Cluster of Class-3 porin protein (Fragment) OS=Neisseria meningitidis GN=porB PE=3 SV=1 (Q51147\_NEIME)  
Cluster of Outer membrane protein class 4 OS=Neisseria meningitidis NM2795 GN=ompM PE=3 SV=1 (A0A125WFE9\_NEIME)  
Cluster of Iron-regulated outer membrane protein (Fragment) OS=Neisseria meningitidis GN=IRA PE=3 SV=1 (Q84029\_NEIME)  
Cluster of Factor I binding protein (Fragment) OS=Neisseria meningitidis GN=ira1870 PE=4 SV=1 (Q30375\_NEIME)  
Cluster of Periplasmic iron-binding protein (Fragment) OS=Neisseria gonorrhoeae GN=fbp PE=4 SV=1 (Q50988\_NEIGO)  
Cluster of IgA-specific serine endopeptidase OS=Neisseria meningitidis (strain alpha14) GN=iga1 PE=4 SV=1 (C65SXX1\_NEIML)  
Cluster of PorA OS=Neisseria meningitidis GN=porA PE=3 SV=1 (QJ0P11\_NEIME)  
Cluster of Transferrin binding protein 1 (Fragment) OS=Neisseria meningitidis GN=tbpA PE=3 SV=1 (Q53136\_NEIME)  
Cluster of Thiol-disulfide interchange protein OS=Neisseria meningitidis serogroup C / serotype 2a (strain ATCC 700532 / DSM 15464 / FAM18) GN=NMCO490 PE=3 SV=1 (A1KSP9\_NEIMF)  
Cluster of Elongation factor Tu OS=Neisseria meningitidis LNP21362 GN=elf PE=3 SV=1 (A0A0AFA088\_NEIME)  
Cluster of Gamma-glutamyltransferase OS=Neisseria meningitidis LNP21362 GN=N875\_01000 PE=4 SV=1 (A0A0A8F236\_NEIME)  
Cluster of Transferrin binding protein B (Fragment) OS=Neisseria meningitidis serogroup B / serotype 15 (strain H44/76) PE=4 SV=1 (A0A0E3SU61\_NEIMH)  
Cluster of Outer membrane protein assembly factor BAmA OS=Neisseria gonorrhoeae GN=ompB8 PE=3 SV=1 (P95359\_NEIGO)  
Cluster of Class 5c outer membrane protein (Fragment) OS=Neisseria meningitidis GN=opc PE=4 SV=1 (Q51228\_NEIME)  
Cluster of Type IV pilus biogenesis and competence protein PilQ OS=Neisseria meningitidis serogroup B / serotype 15 (strain H44/76) GN=pilQ PE=3 SV=2 (PLQ\_NEIMH)  
Cluster of Peptidylprolyl isomerase OS=Neisseria meningitidis GN=CNQ34\_01945 PE=4 SV=1 (A0A2A3LV89\_NEIME)  
Cluster of PIIS cassette OS=Neisseria meningitidis (strain alpha14) GN=pilS2 PE=4 SV=1 (C6S9N9\_NEIML)  
Cluster of 50S ribosomal protein L2 OS=Neisseria meningitidis LNP21362 GN=rplB PE=3 SV=1 (A0A0A8FAA4\_NEIME)  
Uncharacterized protein OS=Neisseria meningitidis LNP21362 GN=N875\_00970 PE=4 SV=1 (A0A0A8F509\_NEIME)  
Cluster of Putative lipoprotein OS=Neisseria meningitidis NM2795 GN=NMEN2795\_1510 PE=4 SV=1 (A0A125WBX2\_NEIME)  
Cluster of Putative extracellular heme-binding protein OS=Neisseria meningitidis alpha275 GN=haeR PE=4 SV=1 (C6S154\_NEIME)  
Uncharacterized protein OS=Neisseria meningitidis LNP21362 GN=N875\_00975 PE=4 SV=1 (A0A0A8F313\_NEIME)  
Cluster of Hemoglobin receptor (Fragment) OS=Neisseria meningitidis GN=hmbR PE=3 SV=1 (BDY09\_NEIME)  
Cluster of Uncharacterized protein OS=Neisseria meningitidis LNP21362 GN=N875\_00075 PE=4 SV=1 (A0A0A8F313\_NEIME)  
Cluster of Uncharacterized protein OS=Neisseria meningitidis (strain alpha14) GN=NMO\_1093 PE=4 SV=1 (C6S797\_NEIML)  
Cluster of Adhesin OS=Neisseria meningitidis LNP21362 GN=N875\_02500 PE=4 SV=1 (A0A0A8F509\_NEIME)  
Cluster of Alcohol dehydrogenase OS=Neisseria meningitidis serogroup B (strain alpha170) GN=radA PE=3 SV=1 (E3D230\_NEIMT)  
Cluster of Cysteine synthase OS=Neisseria meningitidis alpha153 GN=cysK3 PE=4 SV=1 (C6S808\_NEIME)  
Cluster of Putative lipoprotein OS=Neisseria meningitidis NM2795 GN=NMEN2795\_1176 PE=4 SV=1 (A0A125WD37\_NEIME)  
Cluster of 50S ribosomal protein L3 OS=Neisseria meningitidis LNP21362 GN=rplP PE=3 SV=1 (A0A0A8F829\_NEIME)  
Cluster of Peptidyl-prolyl cis-trans isomerase OS=Neisseria meningitidis LNP21362 GN=N875\_08420 PE=4 SV=1 (A0A0A8F8Q5\_NEIME)  
Cluster of Phosphoglycerate kinase OS=Neisseria meningitidis LNP21362 GN=pgk PE=3 SV=1 (A0A0A8F8R2\_NEIME)  
Cluster of Putative serotype P-specific adhesin OS=Neisseria B (strain MC58) GN=NMB1669 PE=4 SV=1 (QJ0XM7\_NEIMB)  
Cluster of LysM domain protein OS=Neisseria meningitidis ATCC 13091 GN=HMPREF0602\_2194 PE=4 SV=1 (E0NCQ2\_NEIME)  
Cluster of Lactoferrin-binding protein B OS=Neisseria meningitidis NM2795 GN=hbp PE=4 SV=1 (A0A125WC21\_NEIME)  
Cluster of Iron-regulated protein FrpA OS=Neisseria meningitidis serogroup C GN=frpA PE=4 SV=1 (FRPA\_NEIMC)  
Cluster of 50S ribosomal protein LNP21362 GN=N875\_01000 PE=3 SV=1 (A0A0A8F3W7\_NEIME)  
Cluster of Peptidase OS=Neisseria meningitidis GN=iga\_2 PE=4 SV=1 (A0A0Y6SUJ0\_NEIME)  
Cluster of Amino acid ABC transporter substrate-binding protein OS=Neisseria meningitidis LNP21362 GN=N875\_03055 PE=3 SV=1 (A0A0A8F2T0\_NEIME)  
Cluster of Phosphate acetyltransferase OS=Neisseria meningitidis alpha522 GN=pta PE=3 SV=1 (ME795\_NEIME)  
Cluster of 50S ribosomal protein L15 OS=Neisseria meningitidis LNP21362 GN=rplO PE=3 SV=1 (A0A0A8F489\_NEIME)  
Cluster of Type IV pilus biogenesis/stability protein PilW OS=Neisseria meningitidis NM2795 GN=pilF PE=4 SV=1 (A0A125WD38\_NEIME)  
Cluster of Hemagglutinin-hemolysin-related protein TpsA2 OS=Neisseria meningitidis 93004 GN=NMEN53004\_1151 PE=4 SV=1 (J8VLH5\_NEIME)  
Cluster of Peptidyl-prolyl isomerase OS=Neisseria C (strain NZ-05/33) GN=NMCC\_1470 PE=3 SV=1 (A9M0Z7\_NEIMD)  
Cluster of Possible lipoprotein OS=Neisseria meningitidis alpha153 GN=yaP PE=4 SV=1 (C6S6E8\_NEIME)  
Cluster of NlpB (Fragment) OS=Neisseria meningitidis GN=nlpB PE=4 SV=1 (A7LA07\_NEIME)  
Cluster of 50S ribosomal protein L24 OS=Neisseria meningitidis GN=rplX PE=3 SV=1 (A0A2A3LQ61\_NEIME)  
Cluster of 60 chaperonin OS=Neisseria meningitidis LNP21362 GN=groEL PE=3 SV=1 (A0A0A8F8D9\_NEIME)  
Cluster of Lipoprotein OS=Neisseria meningitidis GN=gna1946 PE=3 SV=1 (XSEP09\_NEIME)  
Cluster of Carboxy-terminal processing protease CtpA OS=Neisseria meningitidis NM2795 GN=ctpA2 PE=3 SV=1 (A0A125WDK9\_NEIME)  
Cluster of LPS assembly protein OS=Neisseria meningitidis B (strain MC58) GN=nmrD PE=1 SV=1 (LPTD\_NEIME)  
Cluster of Thiolate-binding protein OS=Neisseria meningitidis alpha522 GN=tpa PE=4 SV=1 (MEK21\_NEIME)  
Cluster of Protein Crib OS=Neisseria meningitidis GN=ERS514410\_00524 PE=4 SV=1 (A0A0Y5KUX7\_NEIME)  
Cluster of Uncharacterized protein OS=Neisseria meningitidis LNP21362 GN=N875\_05160 PE=4 SV=1 (A0A0A8F3W2\_NEIME)  
Cluster of Elongation factor Tu OS=Neisseria meningitidis LNP21362 GN=efa PE=3 SV=1 (A0A0A8F479\_NEIME)  
Cluster of IgA-specific serine endopeptidase OS=Neisseria meningitidis alpha153 GN=pilC PE=4 SV=1 (C6S2Q6\_NEIME)  
Cluster of Phosphoenolpyruvate synthase OS=Neisseria meningitidis 93004 GN=ppsA PE=3 SV=1 (J8WMZ9\_NEIME)  
Cluster of Uncharacterized protein OS=Neisseria meningitidis ATCC 13091 GN=HMPREF0602\_0818 PE=4 SV=1 (E0N7Y8\_NEIME)  
Cluster of 50S ribosomal protein LNP21362 GN=rplU PE=3 SV=1 (A0A0A8F8F2\_NEIME)  
Cluster of Uncharacterized protein OS=Neisseria meningitidis LNP21362 GN=N875\_01760 PE=3 SV=1 (A0A0A8F7M1\_NEIME)  
Cluster of Succinate-CoA ligase [ADP-forming] subunit beta OS=Neisseria meningitidis (strain alpha14) GN=sucC PE=3 SV=1 (C6S6M6\_NEIML)  
Cluster of Putative outer membrane protein OS=Neisseria meningitidis 93004 GN=NMEN53004\_0126 PE=4 SV=1 (BVE1E1\_NEIME)  
Cluster of TPR repeat-containing protein OS=Neisseria meningitidis M0579 GN=M0579\_00675 PE=4 SV=1 (A0A0A8BYD5\_NEIME)  
Cluster of Multifunctional fusion protein OS=Neisseria meningitidis GN=nmrB PE=3 SV=1 (A0A1V3SQW6\_NEIME)  
Cluster of 50S ribosomal protein L4 OS=Neisseria meningitidis serogroup B (strain NZ-05/33) GN=rplD PE=3 SV=1 (A0A0E0TN23\_NEIMN)  
Cluster of 2,3-bisubstrate-dependent dehydrogenase OS=Neisseria meningitidis LNP21362 GN=N875\_04030 PE=3 SV=1 (N875\_04030\_NEIME)  
Cluster of Ketol-acid reductoisomerase (NADP(+)) OS=Neisseria meningitidis NM2795 GN=ilvC PE=3 SV=1 (A0A125WC25\_NEIME)  
Cluster of Putrescine-binding periplasmic protein OS=Neisseria meningitidis GN=pod1 PE=3 SV=1 (XSFBA2\_NEIME)  
Cluster of Succinate-CoA ligase [ADP-forming] subunit alpha OS=Neisseria meningitidis GN=sucC PE=3 SV=1 (A0A0Y6U395\_NEIME)  
Cluster of Chaperone SurA OS=Neisseria meningitidis 93004 GN=surA PE=4 SV=1 (J8VH0Q\_NEIME)  
Cluster of 30S ribosomal protein S12 OS=Neisseria meningitidis serogroup B (strain NZ-05/33) GN=psl PE=3 SV=1 (A0A0E0TMP2\_NEIMN)  
Cluster of Glyceraldehyde-3-phosphate dehydrogenase OS=Neisseria meningitidis serogroup B (strain MC58) GN=gapA-2 PE=3 SV=1 (QJ0X95\_NEIME)  
Trypan OS=Sus scrofa PE=1 SV=1  
Cluster of Chaperone protein DnaK OS=Neisseria meningitidis serogroup B / serotype 15 (strain H44/76) GN=dnaK PE=2 SV=1 (ESMV09\_NEIMH)  
Cluster of ABC transporter substrate-binding protein OS=Neisseria meningitidis LNP21362 GN=N875\_06710 PE=4 SV=1 (A0A0A8FA15\_NEIME)  
Cluster of ABC transporter substrate-binding protein OS=Neisseria meningitidis LNP21362 GN=N875\_09885 PE=3 SV=1 (A0A0A8F7F8\_NEIME)  
Cluster of Elongation factor Tu OS=Neisseria meningitidis serogroup B / serotype 15 (strain H44/76) GN=efa PE=3 SV=1 (ESM2J4\_NEIMF)  
Cluster of Peptidyl-prolyl cis-trans isomerase OS=Neisseria meningitidis LNP21362 GN=N875\_03035 PE=3 SV=1 (A0A0A8F859\_NEIME)  
Cluster of Transketolase OS=Neisseria meningitidis 81858 GN=kt PE=3 SV=1 (ROU033\_NEIME)  
Cluster of Porin OS=Neisseria meningitidis GN=porB PE=3 SV=1 (B7S1T2\_NEIME)  
Cluster of Thioredoxin OS=Neisseria meningitidis GN=trxB PE=4 SV=1 (A0A1V0G5E8\_NEIME)  
Keratin, type I cytoskeletal 1 OS=Homo sapiens GN=KRT1 PE=1 SV=6  
Keratin, type I cytoskeletal 2 epidermal OS=Homo sapiens GN=KRT2 PE=1 SV=2  
Uncharacterized protein OS=Neisseria meningitidis GN=A6J54\_02205 PE=4 SV=1  
Cluster of Putative membrane protein OS=Neisseria meningitidis (strain alpha14) GN=NMO\_0724 PE=4 SV=1 (C6S699\_NEIML)  
Cluster of TonB-dependent receptor OS=Neisseria meningitidis LNP21362 GN=N875\_08420 PE=3 SV=1 (A0A0A8F536\_NEIME)  
Cluster of ATP synthase subunit alpha OS=Neisseria meningitidis GN=atpA PE=3 SV=1 (A0A121T6Z3\_NEIME)  
Cluster of Endolase OS=Neisseria meningitidis LNP21362 GN=eno PE=3 SV=1 (A0A0A8F703\_NEIME)  
Cluster of Glutamate dehydrogenase OS=Neisseria meningitidis LNP21362 GN=N875\_09320 PE=3 SV=1 (A0A0A8F716\_NEIME)  
Cluster of Thiol-disulfide interchange protein OS=Neisseria meningitidis NM2795 GN=dsbA3 PE=3 SV=1 (A0A0A125WFY0\_NEIME)  
Cluster of Thioredoxin OS=Neisseria meningitidis serogroup B PE=3 SV=1 (A0A0A8Q426\_NEIM)  
Cluster of 50S ribosomal protein L7/L12 OS=Neisseria meningitidis LNP21362 GN=rplL PE=3 SV=1 (A0A0A8FA86\_NEIME)  
Cluster of ComE operon protein 1-related protein OS=Neisseria meningitidis serogroup B (strain MC58) GN=NMB1657 PE=4 SV=1 (QJ0YB8\_NEIMB)  
Cluster of Pyruvate dehydrogenase E1 component OS=Neisseria meningitidis (strain alpha14) GN=pacE PE=4 SV=1 (C6S7H6\_NEIML)  
30S ribosomal protein S21 OS=Neisseria meningitidis LNP21362 GN=rpsL PE=3 SV=1  
50S ribosomal protein L14 OS=Neisseria meningitidis LNP21362 GN=rplN PE=3 SV=1  
Cluster of 47 lipoprotein OS=Neisseria meningitidis PE=4 SV=1 (QJ0MP9\_NEIME)  
Cluster of 50S ribosomal protein L1 OS=Neisseria meningitidis LNP21362 GN=rplA PE=3 SV=1 (A0A0Y6WE99\_NEIME)  
Cluster of Putative hydrolase OS=Neisseria meningitidis (strain alpha14) GN=NMO\_1967 PE=4 SV=1 (C6S184\_NEIM)  
Cluster of Trigger factor OS=Neisseria meningitidis serogroup B (strain NZ-05/33) GN=trg PE=3 SV=1 (A0A0E0TQY5\_NEIMN)  
LPS-assembly lipoprotein Lpe OS=Neisseria meningitidis LNP21362 GN=lpe PE=3 SV=1  
30S ribosomal protein S4 OS=Neisseria meningitidis LNP21362 GN=rpsD PE=3 SV=1  
50S ribosomal protein L27 OS=Neisseria meningitidis LNP21362 GN=rplM PE=3 SV=1  
Cluster of Lipoprotein NlpD, putative OS=Neisseria meningitidis GN=nlpD PE=4 SV=1 (A0A0Y5C793\_NEIME)  
Cluster of NADH-ubiquinone oxidoreductase OS=Neisseria meningitidis LNP21362 GN=N875\_03675 PE=4 SV=1 (A0A0A8FA41\_NEIME)  
Cluster of Protein-export protein SecE OS=Neisseria meningitidis LNP21362 GN=secE PE=3 SV=1 (A0A0A8FAU2\_NEIME)  
Cluster of Uncharacterized protein OS=Neisseria meningitidis NM2795 GN=NMEN2795\_1566 PE=4 SV=1 (A0A125WCH0\_NEIME)  
50S ribosomal protein L29 OS=Neisseria meningitidis LNP21362 GN=rpmC PE=3 SV=1  
Cluster of Heme ABC exporter, ATP-binding protein CmaA OS=Neisseria meningitidis NM2795 GN=NMEN2795\_0410 PE=4 SV=1 (A0A125WFA8\_NEIME)  
Cluster of Outer membrane protein assembly factor BamD OS=Neisseria meningitidis LNP21362 GN=bamD PE=3 SV=1 (A0A0A8F481\_NEIME)  
Cluster of Outer-membrane lipoprotein LolB OS=Neisseria meningitidis alpha153 GN=lob PE=3 SV=1 (C6SCD3\_NEIME)  
Cluster of Pyruvate kinase OS=Neisseria meningitidis serogroup B (strain NZ-05/33) GN=pyk PE=3 SV=1 (A0A0E0TMU0\_NEIMN)  
Cluster of Serine hydroxymethyltransferase OS=Neisseria meningitidis LNP21362 GN=glyA PE=3 SV=1 (A0A0A8F7J0\_NEIME)

| Accession Number       | Alternate ID          | Total Spectrum Count |     |          |            |
|------------------------|-----------------------|----------------------|-----|----------|------------|
|                        |                       | MW (kDa)             | WT  | NORM.VOL | NORM-Empty |
| Q51147_NEIME [83]      | porB                  | 34                   | 362 | 1445     | 1225       |
| A0A125WFE9_NEIME [8]   | mpm                   | 26                   | 936 | 433      | 485        |
| Q84029_NEIME [37]      | fbA                   | 74                   | 31  | 360      | 301        |
| Q30375_NEIME [74]      | gna1870               | 23                   | 35  | 110      | 82         |
| Q50988_NEIGO [10]      | tpa                   | 34                   | 32  | 283      | 383        |
| C6S5X1_NEIML [29]      | iga1                  | 203                  | 20  | 417      | 498        |
| QJ0P11_NEIME [196]     | porA                  | 42                   | 69  | 301      | 310        |
| Q53136_NEIME [26]      | tbpA                  | 69                   | 44  | 110      | 82         |
| A1KSP9_NEIMF [10]      | NMC0490               | 31                   | 39  | 76       | 93         |
| A0A0AFA088_NEIME [10]  | tmf                   | 43                   | 90  | 192      | 248        |
| A0A0A8F236_NEIME [10]  | n875_01600            | 85                   | 90  | 94       | 86         |
| A0A0E3SU61_NEIMH [30]  | tpbB                  | 72                   | 4   | 61       | 51         |
| P95359_NEIGO [12]      | omp85                 | 88                   | 126 | 88       | 86         |
| Q51228_NEIME [8]       | opc                   | 28                   | 4   | 17       | 19         |
| PLQ_NEIMH [3]          | pilQ                  | 83                   | 172 | 93       | 131        |
| A0A2A3LV89_NEIME [5]   | CNQ34_01945           | 31                   | 64  | 71       | 81         |
| C6S9N9_NEIML [35]      | pilS2                 | 12                   | 252 | 22       | 94         |
| A0A0A8FAA4_NEIME [10]  | rplB                  | 30                   | 169 | 9        | 28         |
| A0A0A8F533_NEIME (+2)  | N875_00970            | 14                   | 61  | 31       | 48         |
| A0A125WBX2_NEIME [2]   | NMEN2795_1510         | 14                   | 134 | 64       | 47         |
| C6S154_NEIME [14]      | haeR                  | 29                   | 53  | 66       | 44         |
| N82XV6_NEIME [10]      | LbpA                  | 105                  | 1   | 45       | 29         |
| BDY09_NEIME [8]        | hmbR                  | 87                   | 6   | 30       | 37         |
| N875_00975             |                       | 13                   | 30  | 18       | 34         |
| C6S797_NEIML [4]       | NMO_1093              | 11                   | 82  | 46       | 59         |
| A0A0A8F509_NEIME [3]   | adnA                  | 13                   | 120 | 13       | 32         |
| E3D230_NEIMT [9]       | adnA                  | 37                   | 0   | 84       | 97         |
| C6S808_NEIME [7]       | cysK3                 | 5                    | 12  | 91       | 121        |
| A0A125WD37_NEIME [17]  | nmC                   | 24                   | 40  | 34       | 38         |
| A0A0A8F829_NEIME [14]  | N875_08420            | 33                   | 23  | 38       | 41         |
| A0A0A8F8Q5_NEIME [4]   | pgk                   | 44                   | 36  | 41       | 56         |
| A0A0A8F8R2_NEIME [10]  | nmB1969               | 74                   | 114 | 63       | 63         |
| N875_04030             | E0NCQ2_NEIME [5]      | 50                   | 85  | 71       | 90         |
| HMPREF0602_2194        | lbpB                  | 83                   | 3   | 39       | 47         |
| A0A125WC21_NEIME [11]  | FRPA_NEIMC [13]       | 122                  | 0   | 107      | 102        |
| FRPA_NEIMC [13]        | adnA                  | 5                    | 4   | 19       | 19         |
| A0A0A8F3W7_NEIME [17]  | iga_2                 | 114                  | 8   | 55       | 71         |
| A0A0A8F2T0_NEIME [4]   | N875_03055            | 29                   | 63  | 18       | 32         |
| ME795_NEIME [10]       | pta                   | 72                   | 12  | 35       | 92         |
| A0A0A8F489_NEIME [14]  | pilF                  | 28                   | 35  | 20       | 15         |
| A0A125WD38_NEIME [7]   | N875_08420            | 33                   | 23  | 38       | 41         |
| J8VLH5_NEIME [14]      | NMEN3004_1151         | 255                  | 1   | 15       | 32         |
| NM0ZT_1470             | NM0ZT_1470            | 15                   | 0   | 13       | 27         |
| C6S6E8_NEIME [16]      | yaP                   | 19                   | 26  | 28       | 32         |
| ATL0A7_NEIME [14]      | nlpB                  | 37                   | 106 | 38       | 34         |
| A0A2A3LQ61_NEIME [2]   | gna1                  | 12                   | 16  | 0        | 13         |
| A0A0A8F8D9_NEIME [15]  | groL                  | 57                   | 34  | 24       | 43         |
| XSEP09_NEIME [5]       | cpa1946               | 31                   | 163 | 13       | 24         |
| A0A125WDK9_NEIME [8]   | tpa2                  | 53                   | 15  | 52       | 38         |
| LPTD_NEIME [8]         | MEK21_NEIME [4]       | 88                   | 28  | 17       | 24         |
| ERS514410_00524        | ERS514410_00524       | 17                   | 0   | 16       | 18         |
| N875_05160             | N875_05160            | 19                   | 19  | 22       | 21         |
| A0A0A8F479_NEIME [11]  | pic1                  | 159                  | 11  | 97       | 109        |
| C6S2Q6_NEIME [17]      | ppsA                  | 87                   | 14  | 10       | 29         |
| J8WMZ9_NEIME [5]       | E0N7Y8_NEIME [2]      | 11                   | 76  | 14       | 22         |
| HMPREF0602_0618        | A0A0A8F8F2_NEIME [16] | 20                   | 5   | 30       | 58         |
| N875_01760             | A0A0A8F7M1_NEIME [9]  | 20                   | 5   | 30       | 58         |
| C6S6M6_NEIML [5]       | sucC                  | 41                   | 8   | 25       | 27         |
| BVE1E1_NEIME [5]       | NMEN53004_0126        | 55                   | 1   | 11       | 26         |
| M0579_00675            | NM0579_00675          | 5                    | 17  | 23       | 6          |
| A0A1V3SQW6_NEIME [8]   | mriB                  | 58                   | 39  | 21       | 32         |
| A0A0E0TN23_NEIMN [5]   | nmrD                  | 23                   | 58  | 1        | 26         |
| N875_04030             | A0A0A8F4M9_NEIME [3]  | 38                   | 1   | 28       | 39         |
| A0A125WC25_NEIME [5]   | ilvC                  | 36                   | 91  | 2        | 21         |
| XSFBA2_NEIME [4]       | pod1                  | 44                   | 83  | 7        | 21         |
| A0A0Y6U395_NEIME [3]   | sucD                  | 31                   | 4   | 18       | 23         |
| B7S1T2_NEIME [26]      | surA                  | 46                   | 163 | 2        | 12         |
| A0A0E0TMP2_NEIMN [17]  | rpsL                  | 14                   | 35  | 7        | 22         |
| QJ0X95_NEIME [5]       | gapA-2                | 36                   | 79  | 8        | 10         |
| TRYP_PG                |                       | 24                   | 10  | 9        | 9          |
| ESMV09_NEIMH [7]       | dnaK                  | 67                   | 21  | 18       | 37         |
| A0A0A8FA15_NEIME [7]   | N875_06710            | 36                   | 2   | 32       | 27         |
| A0A0A8F7F8_NEIME [7]   | N875_09885            | 29                   | 44  | 4        | 12         |
| ESM2J4_NEIMF [5]       | trf                   | 30                   | 6   | 19       | 36         |
| A0A0A8F859_NEIME [20]  | N875_03035            | 19                   | 4   | 50       | 33         |
| ROU033_NEIME [8]       | kt                    | 72                   | 4   | 13       | 24         |
| B7S1T2_NEIME [26]      | porB                  | 38                   | 12  | 24       | 22         |
| A0A1V0G5E8_NEIME [3]   | trxB                  | 18                   | 2   | 15       | 23         |
| K2C1_HUMAN             | KRT1                  | 66                   | 11  | 10       | 13         |
| K2Z2_HUMAN             | KRT2                  | 66                   | 5   | 10       | 4          |
| A0A1R1N790_NEIME (+2)  | ALJL54_02205          | 9                    | 11  | 8        | 13         |
| C6S699_NEIML [3]       | NMO_0724              | 24                   | 5   | 5        | 10         |
| A0A0A8F536_NEIME [3]   | N875_08420            | 77                   | 0   | 9        | 6          |
| A0A121T6Z3_NEIME [5]   | atpA                  | 55                   | 76  | 2        | 8          |
| A0A0A8F703_NEIME [7]   | eno                   | 46                   | 163 | 2        | 12         |
| A0A0A8F716_NEIME [10]  | N875_09320            | 48                   | 78  | 6        | 15         |
| A0A125WFY0_NEIME [5]   | dsbA3                 | 26                   | 47  | 0        | 9          |
| A0A0H5Q426_NEIM [10]   | trxB                  | 105                  | 1   | 45       | 29         |
| A0A0A8FA86_NEIME [20]  | nplL                  | 13                   | 47  | 11       | 15         |
| QJ0YB8_NEIMB [3]       | NMB1657               | 22                   | 11  | 1        | 8          |
| C6S7H6_NEIML [5]       | aceE                  | 100                  | 8   | 14       | 37         |
| A0A0A8F509_NEIME (+16) | rplN                  | 13                   | 45  | 1        | 0          |
| QJ0MP9_NEIME [7]       | QJ0MP9_NEIME [7]      | 42                   | 34  | 9        | 16         |
| A0A0Y6WE99_NEIME [3]   | rgIA                  | 24                   | 11  | 2        | 19         |
| C6S184_NEIM            | NMO_1967              | 19                   | 14  | 22       | 19         |
| A0A0E0TQY5_NEIMN [4]   | lpe                   | 48                   | 10  | 26       | 51         |
| A0A0A8FA45_NEIME (+5)  | tg                    | 18                   | 12  | 9        | 7          |
| A0A0A8FAC5_NEIME (+16) | rplD                  | 23                   | 24  | 0        | 11         |
| A0A0A8F8N4_NEIME (+15) | rpmA                  | 10                   | 5   | 1        | 11         |
| A0A0Y5C793_NEIME [3]   | nlpD                  | 42                   | 33  | 17       | 22         |
| A0A0A8FA41_NEIME [7]   | N875_03675            | 46                   | 2   | 14       | 26         |
| A0A0A8FAU2_NEIME [7]   | secE                  | 16                   | 12  | 8        | 16         |
| A0A125WCH0_NEIME [8]   | nmC                   | 17                   | 4   | 37       | 44         |
| A0A0A8FAA9_NEIME (+18) | rpmC                  | 7                    | 6   | 0        | 8          |
| NMEN2795_0410          | NMEN2795_0410         | 62                   | 0   | 6        | 25         |
| A0A0A8F481_NEIME       | band                  | 34                   | 12  | 8        | 8          |
| C6SCD3_NEIME [5]       | lob                   | 25                   | 14  | 0        | 5          |
| A0A0E0TMU0_NEIMN [8]   | pyk                   | 52                   | 3   | 6        | 6          |
| A0A0A8F7J0_NEIME [10]  | glyA                  | 45                   | 3   | 11       | 5          |

Cluster of Superoxide dismutase [Cu-Zn] OS=Neisseria meningitidis GN=sodC PE=3 SV=1 (A0A0Y5YZ13\_NEIME)  
Cluster of Uncharacterized protein OS=Neisseria meningitidis alpha275 GN=NMW\_2164 PE=4 SV=1 (CS6SM5\_NEIME)  
Keratin, type I cytoskeletal 10 OS=Homo sapiens GN=KRT10 PE=1 SV=6  
Uncharacterized protein OS=Neisseria meningitidis serogroup B (strain NZ-0533) GN=NMNBZ0533\_1106 PE=4 SV=1  
Cluster of 5-methyltetrahydropteroylglutamate--homocysteine methyltransferase OS=Neisseria meningitidis (strain alpha14) GN=metE PE=3 SV=1 (CS6SL6\_NEIML)  
Cluster of 50S ribosomal protein L25 OS=Neisseria meningitidis GN=rlsA PE=3 SV=1 (E0N4S3\_NEIME)  
Cluster of Acetate kinase OS=Neisseria meningitidis alpha275 GN=fackA PE=3 SV=1 (CS6SHZ\_NEIME)  
Cluster of Adenylate kinase OS=Neisseria meningitidis LNP21362 GN=radK PE=3 SV=1 (A0A0AF325\_NEIME)  
Cluster of Bacterioferritin OS=Neisseria meningitidis LNP21362 GN=N875\_00990 PE=3 SV=1 (A0A0AF157\_NEIME)  
Cluster of Polyribonucleotase OS=Neisseria meningitidis ATCC 13091 GN=ppn PE=3 SV=1 (E0NA11\_NEIME)  
Cluster of Putative peroxiredoxin/glutathione family protein OS=Neisseria meningitidis alpha275 GN=NMW\_2538 PE=4 SV=1 (CS6KNK\_NEIME)  
Cluster of Tetrahydropteroyl repeat protein OS=Neisseria meningitidis serogroup B (strain NZ-0533) GN=NMNBZ0533\_0916 PE=4 SV=1 (A0A0E0TPL8\_NEIMN)  
Cluster of Thiol disulfide interchange protein DnaD OS=Neisseria meningitidis GN=dnad PE=3 SV=1 (A0A2AAL231\_NEIME)  
Cluster of 50S ribosomal protein L28 OS=Neisseria meningitidis LNP21362 GN=ppmB PE=3 SV=1 (A0A0AF5E8\_NEIME)  
Cluster of Membrane protein OS=Neisseria meningitidis LNP21362 GN=N875\_00130 PE=4 SV=1 (A0A0AF2K7\_NEIME)  
Cluster of NADPH-dependent FMN reductase OS=Neisseria meningitidis serogroup B (strain NZ-0533) GN=NMNBZ0533\_0530 PE=4 SV=1 (A0A0E0TNZ7\_NEIMN)  
Cluster of Putrescine-binding periplasmic protein OS=Neisseria meningitidis serogroup B PE=3 SV=1 (A0A0H5QV38\_NEIME)  
Cluster of Sec-independent protein translocase protein YaaA OS=Neisseria meningitidis LNP21362 GN=yaaA PE=3 SV=1 (A0A0AF8390\_NEIME)  
Cluster of Transaldolase OS=Neisseria meningitidis LNP21362 GN=tal PE=3 SV=1 (A0A0AF6R0\_NEIME)  
Elongation factor P OS=Neisseria meningitidis LNP21362 GN=efp PE=3 SV=1  
Transferin binding protein B (Fragment) OS=Neisseria meningitidis PE=4 SV=1  
Cluster of Uncharacterized protein OS=Neisseria meningitidis LNP21362 GN=N875\_02780 PE=4 SV=1 (A0A0AF2N5\_NEIME)  
Cluster of Outer membrane protein OS=Neisseria meningitidis (strain alpha14) GN=mspA PE=4 SV=1 (CS6SS9\_NEIML)  
Cluster of Lamrinin subunit alpha Lamrinin A chain OS=Neisseria meningitidis alpha522 GN=alpA PE=4 SV=1 (ME754\_NEIME)  
Cluster of Putative lipoprotein OS=Neisseria meningitidis NM2795 GN=NMENZ795\_0105 PE=4 SV=1 (A0A125WFK9\_NEIME)  
Cluster of Transglycosylase OS=Neisseria meningitidis GN=sat PE=4 SV=1 (A0A0Y5YPU4\_NEIME)  
30S ribosomal protein S19 OS=Neisseria meningitidis LNP21362 GN=psl PE=3 SV=1  
Cluster of 50S ribosomal protein N2795 GN=ppB PE=3 SV=1 (A0A125WAS9\_NEIME)  
Cluster of 50S ribosomal protein L11 OS=Neisseria meningitidis GN=ppK PE=3 SV=1 (A0A121QVP4\_NEIME)  
Cluster of 50S ribosomal protein L9 OS=Neisseria meningitidis NM2795 GN=ppL PE=3 SV=1 (A0A125WD48\_NEIME)  
Cluster of DNA-directed RNA polymerase subunit beta' OS=Neisseria meningitidis GN=ppoc PE=3 SV=1 (A0A1V3SMAK8\_NEIME)  
Cluster of Glutamine synthetase OS=Neisseria meningitidis LNP21362 GN=gsaA PE=3 SV=1 (A0A0AF6U2\_NEIME)  
Acyl carrier protein OS=Neisseria meningitidis LNP21362 GN=acpP PE=3 SV=1  
Cluster of 3-oxoacyl-CoA dehydrogenase OS=Neisseria meningitidis GN=leuB PE=3 SV=1 (A0A1V3SR58\_NEIME)  
Cluster of 3-oxoacyl-CoA dehydrogenase OS=Neisseria meningitidis (strain alpha14) GN=leuB PE=4 SV=1 (CS6SS0\_NEIML)  
Cluster of 50S ribosomal protein L13 OS=Neisseria meningitidis serogroup B / serotype 15 (strain H4476) GN=ppM PE=3 SV=1 (E0M2P5\_NEIMH)  
Cluster of Aminomethyltransferase OS=Neisseria meningitidis LNP21362 GN=gcvT PE=3 SV=1 (A0A0AF4N6\_NEIME)  
Cluster of Bifunctional purine biosynthesis protein PurH OS=Neisseria meningitidis serogroup B GN=ppuH PE=3 SV=1 (A0A0H5QDY1\_NEIME)  
Cluster of Isocitrate--RNA ligase OS=Neisseria / serotype 4A (strain Z2491) GN=hisA PE=3 SV=1 (SV1\_NEIME)  
Cluster of Outer membrane ferric siderophore receptor OS=Neisseria meningitidis (strain alpha14) GN=NMO\_0332 PE=3 SV=1 (CS6S79\_NEIML)  
Cluster of Phosphoribosylformylglycinamide cyclo-ligase OS=Neisseria meningitidis LNP21362 GN=ppuM PE=3 SV=1 (A0A0AF228\_NEIME)  
Cluster of Ribonucleoside-diphosphate reductase OS=Neisseria meningitidis GN=A6J54\_08400 PE=3 SV=1 (A0A1V0GT79\_NEIME)  
Cluster of Uncharacterized protein OS=Neisseria meningitidis C (strain 033442) GN=NMOC\_548 PE=4 SV=1 (ADMTE0\_NEIME)  
Cluster of UPP2010 protein N875\_09670 OS=Neisseria meningitidis LNP21362 GN=N875\_09670 PE=3 SV=1 (A0A0AF7B8\_NEIME)  
Peptide deformylase OS=Neisseria meningitidis LNP21362 GN=def PE=3 SV=1  
Transferin binding protein B (Fragment) OS=Neisseria meningitidis PE=4 SV=1  
Uncharacterized protein OS=Neisseria meningitidis ATCC 13091 GN=HMPREF0602\_1882 PE=4 SV=1  
Cluster of Uncharacterized protein OS=Neisseria meningitidis GN=ERS514729\_00095 PE=4 SV=1 (A0A0Y6E3F5\_NEIME)  
Cluster of Uncharacterized protein OS=Neisseria meningitidis GN=A6J54\_08695 PE=4 SV=1 (A0A1V0GB02\_NEIME)  
Cluster of Uncharacterized protein OS=Neisseria meningitidis GN=A6J27\_06600 PE=4 SV=1 (A0A1B1ZDL3\_NEIME)  
Peptidase M23 OS=Neisseria meningitidis LNP21362 GN=N875\_09105 PE=4 SV=1  
30S ribosomal protein S13 OS=Neisseria meningitidis GN=ppM PE=3 SV=1  
Alkyl hydroxide reductase AhrpD OS=Neisseria meningitidis serogroup B (strain NZ-0533) GN=NMNBZ0533\_1569 PE=3 SV=1  
Cluster of 30S ribosomal protein S11 OS=Neisseria meningitidis LNP21362 GN=ppsk PE=3 SV=1 (A0A0AF4X2\_NEIME)  
Cluster of Adenylosuccinate synthetase OS=Neisseria meningitidis GN=ppuA PE=3 SV=1 (A0A1V0GX3\_NEIME)  
Cluster of Aminotransferase OS=Neisseria meningitidis NM2795 GN=tyb2 PE=3 SV=1 (A0A125WEM1\_NEIME)  
Cluster of Argininosuccinate lyase OS=Neisseria meningitidis NM2795 GN=argG PE=3 SV=1 (A0A125WAV9\_NEIME)  
Cluster of Branched-chain amino acid aminotransferase OS=Neisseria meningitidis 93004 GN=ivE PE=4 SV=1 (J0T6C2\_NEIME)  
Cluster of Chemotaxis protein CheY OS=Neisseria meningitidis LNP21362 GN=N875\_04075 PE=4 SV=1 (A0A0AF8Q07\_NEIME)  
Cluster of Electron transfer flavoprotein FAD-binding domain protein OS=Neisseria meningitidis ATCC 13091 GN=mta PE=4 SV=1 (E0NC51\_NEIME)  
Cluster of Glutamate--cysteine ligase OS=Neisseria meningitidis LNP21362 GN=gluA PE=3 SV=1 (A0A1Z5WAV9\_NEIME)  
Cluster of Leucine--RNA ligase OS=Neisseria meningitidis NM2795 GN=leuS PE=3 SV=1 (A0A125WBF2\_NEIME)  
Cluster of Malate phosphorylase OS=Neisseria meningitidis (strain alpha14) GN=mapA PE=4 SV=1 (CS6SR9\_NEIML)  
Cluster of Oligopeptidase A OS=Neisseria meningitidis NM2795 GN=pp1 PE=3 SV=1 (A0A125WFR0\_NEIME)  
Cluster of Putative large exoprotein involved in heme utilization or adhesion of Shiga/HecA/FlaA family OS=Neisseria meningitidis serogroup B PE=4 SV=1 (A0A0H5QAE5\_NEIML)  
Cluster of Putative peptidase OS=Neisseria meningitidis alpha275 GN=nlpD1 PE=4 SV=1 (CS6H79\_NEIME)  
Cluster of Ribonuclease E OS=Neisseria meningitidis serogroup A / serotype 4A (strain Z2491) GN=rnaE PE=3 SV=1 (A0A0U1RG59\_NEIMA)  
Cluster of Valine--RNA ligase OS=Neisseria meningitidis LNP21362 GN=ivB PE=3 SV=1 (A0A0AF691\_NEIME)  
Lactoferrin-binding protein B OS=Neisseria meningitidis GN=B1A92\_10920 PE=4 SV=1  
Putative cytochrome oxidase subunit OS=Neisseria meningitidis serogroup A / serotype 4A (strain Z2491) GN=NMA1979 PE=4 SV=1  
30S ribosomal protein S17 OS=Neisseria meningitidis LNP21362 GN=ppaD PE=3 SV=1  
30S ribosomal protein OS=Neisseria meningitidis LNP21362 GN=ppE PE=3 SV=1  
50S ribosomal protein L22 OS=Neisseria meningitidis LNP21362 GN=ppV PE=3 SV=1  
50S ribosomal protein L36 OS=Neisseria meningitidis serogroup B (strain NZ-0533) GN=ppuL PE=3 SV=1  
Cell division protein Pz2 OS=Neisseria meningitidis LNP21362 GN=fbz PE=3 SV=1  
Cluster of 2,3,4,5-tetrahydroxydine-2,6-dicarboxylate N-succinyltransferase OS=Neisseria meningitidis GN=dapD PE=3 SV=1 (A0A0Y6TGX3\_NEIME)  
Cluster of 23S rRNA (guanosine-2'-O-)-methyltransferase RlmB OS=Neisseria meningitidis ATCC 13091 GN=rmbB PE=3 SV=1 (E0NK92\_NEIME)  
Cluster of 50S ribosomal protein L10 OS=Neisseria meningitidis LNP21362 GN=ppJ PE=3 SV=1 (A0A0AF458\_NEIME)  
Cluster of Arylsulfatase OS=Neisseria meningitidis ATCC 13091 GN=HMPREF0602\_0390 PE=4 SV=1 (E0NTB0\_NEIME)  
Cluster of Aspartokinase OS=Neisseria meningitidis ATCC 13091 GN=lysC PE=3 SV=1 (E0NTV4\_NEIME)  
Cluster of Carbamoyl-phosphate synthase large chain OS=Neisseria meningitidis serogroup B (strain MC58) GN=carB PE=3 SV=1 (CARB\_NEIMB)  
Cluster of Cysteine desulfurase IcsB OS=Neisseria meningitidis serogroup B (strain MC58) GN=icsB PE=3 SV=1 (ICSB\_NEIMB)  
Cluster of Efflux pump membrane transporter OS=Neisseria meningitidis LNP21362 GN=N875\_09290 PE=3 SV=1 (A0A0AF772\_NEIME)  
Cluster of Glucokinase OS=Neisseria meningitidis M0579 GN=glk\_2 PE=3 SV=1 (A0A0G4BV0C\_NEIME)  
Cluster of Hemolysin secretion/activation protein, ShB family OS=Neisseria meningitidis serogroup B (strain NZ-0533) GN=NMNBZ0533\_1736 PE=4 SV=1 (A0A0E0TRV2\_NEIMN)  
Cluster of Nitrogen regulatory protein P-2 OS=Neisseria meningitidis (strain H4476) GN=nmrB\_0187 PE=3 SV=1 (E0NMV1\_NEIMH)  
Cluster of Outer membrane protein assembly factor BamE OS=Neisseria meningitidis (strain alpha14) GN=bamE PE=3 SV=1 (CS6995\_NEIML)  
Cluster of Peptidase OS=Neisseria meningitidis LNP21362 GN=N875\_07960 PE=4 SV=1 (A0A0AF6D7\_NEIME)  
Cluster of Pilus assembly protein PilP OS=Neisseria meningitidis LNP21362 GN=N875\_04710 PE=4 SV=1 (A0A0AF925\_NEIME)  
Cluster of Protein translocase subunit SecY OS=Neisseria meningitidis GN=sacA\_1 PE=3 SV=1 (A0A0Y5FM4\_NEIME)  
Cluster of Putative iron-sulfur cluster insertion protein ErpA OS=Neisseria meningitidis serogroup B (strain NZ-0533) GN=erpa PE=3 SV=1 (A0A0E0TQ68\_NEIMN)  
Cluster of Single-stranded DNA-binding protein OS=Neisseria meningitidis serogroup B (strain NZ-0533) GN=ssb PE=3 SV=1 (A0A0E0TS6\_NEIMN)  
Cluster of Site-determining factor OS=Neisseria meningitidis LNP21362 GN=N875\_07400 PE=3 SV=1 (A0A0AF4X0\_NEIME)  
Hemagglutinin/hemolysin family protein OS=Neisseria meningitidis GN=haB\_1 PE=4 SV=1  
Lactoferrin-binding protein B OS=Neisseria meningitidis 93004 GN=lbpB PE=4 SV=1  
Transferin-binding protein 1 (Fragment) OS=Neisseria meningitidis LNP21362 GN=hisA PE=3 SV=1  
Universal stress protein OS=Neisseria meningitidis LNP21362 GN=N875\_10440 PE=3 SV=1  
1-(5-phosphoribosyl)-5-[5-(phosphoribosylamino)methylideneamino]imidazole-4-carboxamide isomerase OS=Neisseria meningitidis LNP21362 GN=hisA PE=3 SV=1  
1-acyl-glycerol-3-phosphate acyltransferase OS=Neisseria meningitidis serogroup B PE=3 SV=1  
30S ribosomal protein S14 OS=Neisseria meningitidis LNP21362 GN=ppM PE=3 SV=1  
50S ribosomal protein L25 OS=Neisseria meningitidis M0579 GN=ppM PE=3 SV=1  
50S ribosomal protein L36 OS=Neisseria meningitidis LNP21362 GN=ppM PE=3 SV=1  
Acetylactate synthase OS=Neisseria meningitidis LNP21362 GN=N875\_10110 PE=4 SV=1  
Argininosuccinate synthetase OS=Neisseria meningitidis serogroup A / serotype 4A (strain Z2491) GN=argG PE=3 SV=1  
Cluster of 3-hydroxyacid dehydrogenase OS=Neisseria meningitidis NM2795 GN=mmB PE=4 SV=1 (A0A125WC35\_NEIME)  
Cluster of 3-oxoacyl-CoA carrier-protein synthase 2 OS=Neisseria meningitidis LNP21362 GN=N875\_07730 PE=3 SV=1 (A0A0AF8FP2\_NEIME)  
Cluster of 50S ribosomal protein L17 OS=Neisseria meningitidis 93004 GN=ppQ PE=3 SV=1 (J8WTP2\_NEIME)  
Cluster of 50S ribosomal protein L20 OS=Neisseria meningitidis alpha153 GN=ppL PE=3 SV=1 (CS6AQ2\_NEIME)  
Cluster of Antibiotic biosynthesis monooxygenase OS=Neisseria meningitidis LNP21362 GN=N875\_10115 PE=4 SV=1 (A0A0AFBM2\_NEIME)  
Cluster of Beta-phosphoglucomutase OS=Neisseria meningitidis serogroup B / serotype 15 (strain H4476) GN=ppmB PE=4 SV=1 (E0M2X5\_NEIMH)  
Cluster of D-alanyl-D-alanine carboxypeptidase-D-alanyl-D-alanine-endopeptidase OS=Neisseria meningitidis 81658 GN=dacB PE=4 SV=1 (R0TXR8\_NEIME)  
Cluster of Delta-aminolevulinic acid dehydratase OS=Neisseria meningitidis serogroup A / serotype 4A (strain Z2491) GN=NMA1011 PE=3 SV=1 (A0A0U1IRB2\_NEIMA)  
Cluster of DNA gyrase subunit A OS=Neisseria meningitidis GN=gyrA PE=3 SV=1 (A0A076U6M4\_NEIME)  
Cluster of dTDP-4-dehydrothiamine 3,5-epimerase OS=Neisseria meningitidis GN=rbc PE=3 SV=1 (Q51155\_NEIME)  
Cluster of FeaB (Fragment) OS=Neisseria meningitidis GN=feaB PE=4 SV=1 (REVERSE\_W6AQ02\_NEIME-DECOY)

A0A0Y5YZ13\_NEIME [8] sodC 20 0 8 4 8  
CS6SM5\_NEIME [8] NMW\_2164 23 10 15 9 8  
KRT10\_HUMAN 80 3 6 7 8  
NMNBZ0533\_1106 20 23 7 8 8  
meE 85 14 11 13 7  
E0NA53\_NEIME [8] 11 0 0 0 5 7  
CS6SHZ\_NEIME [4] acsA 31 9 23 29 7  
A0A0AF325\_NEIME [6] adk 23 2 14 19 7  
A0A0AF157\_NEIME [18] N875\_00990 18 115 2 3 7  
E0NA11\_NEIME [3] E0NA11\_NEIME [3] 76 1 13 7  
CS6KNK\_NEIME [9] NMW\_2538 24 32 5 17 7  
NMNBZ0533\_0916 69 6 27 14 7  
adaA2331\_NLR2\_NEIME [6] adaA2331\_NLR2\_NEIME [6] 66 10 10 10 10  
ppmB 9 49 1 8 6  
N875\_00130 23 3 2 6 6  
A0A0E0TNZ7\_NEIMN [7] A0A0E0TNZ7\_NEIMN [7] 21 1 16 18 8  
NMNBZ0533\_0530 44 18 5 9 6  
tstA 7 5 0 7 6  
A0A0AF6R0\_NEIME [10] tal 37 2 11 14 6  
A0A0AF754\_NEIME (-7) efp 21 3 8 6 6  
A0A1E3SS54\_NEIME 15 1 1 0 6  
N875\_02780 12 3 2 3 5  
CS6SS9\_NEIML nspA 18 0 3 11 5  
ME754\_NEIME [2] bpc 36 8 1 0 5  
NMENZ795\_0105 37 12 2 2 5  
A0A0Y5YPU4\_NEIME [8] alt 68 72 2 0 5  
A0A0AF5L3\_NEIME (+18) rpsL 14 8 1 6 5  
A0A125WAS9\_NEIME PE=4 [4] rpsB 27 24 1 12 3  
A0A121QVP4\_NEIME rplK 15 7 0 8 5  
A0A125WD48\_NEIME [6] rplI 16 43 0 15 5  
A0A1V3SMAK8\_NEIME [5] ppC 154 16 3 18 5  
A0A0AF6U2\_NEIME (+11) glnA 52 68 11 8 5  
A0A0AF569\_NEIME (+18) acpP 9 3 7 6 4  
leuB 39 2 7 9 4  
CS6SS0\_NEIML [5] bsd 40 13 14 12 3  
E0M2P5\_NEIMH [18] rplM 15 17 0 3 4  
A0A0AF4N6\_NEIME [6] gcvT 40 1 8 10 4  
A0A0H5QDY1\_NEIMH [4] purH 60 0 13 38 4  
SV1\_NEIMA [4] sv1\_NEIMA [4] 5 1 0 5 1  
CS6S79\_NEIML nmo\_0332 78 0 0 1 4  
A0A0AF228\_NEIME [10] purM 37 1 1 4 9 4  
A0A1V0GT79\_NEIME [4] A0J54\_08400 85 1 10 15 4  
NMOC\_1548 12 4 0 12 3  
A0A0AF7B8\_NEIME [9] N875\_09670 46 9 0 5 4  
A0A0AF648\_NEIME (+15) def 19 2 10 12 4  
A0A0E3X10\_NEIME 15 2 2 8 5  
E0NBK0\_NEIME HMPREF0602\_1882 9 4 3 3 3  
A0A0Y6E3F5\_NEIME ERS514729\_00095 12 7 0 0 3  
A0A1V0GB02\_NEIME A6J54\_08695 13 6 3 4 3  
A0A1B1ZDL3\_NEIME A6J27\_06600 19 3 2 2 3  
A0A0AF6Y2\_NEIME (+13) N875\_09105 24 5 5 5 3  
A0A112L1G6\_NEIME rpsM 13 19 2 5 3  
A0A0E0TRC2\_NEIME (+12) A0A0E0TRC2\_NEIME (+12) 4 1 1 2 3  
A0A0AF4X2\_NEIME ppkA 14 5 3 7 3  
A0A1V0GX3\_NEIME purA 46 0 4 5 3  
tyb2 44 4 5 9 3  
A0A125WAV9\_NEIME [3] rpsA 40 1 1 2 3  
J0T6C2\_NEIME [6] iivE 36 3 0 0 3  
N875\_04075 25 0 6 17 3  
E0NC51\_NEIME [6] etA 33 4 7 9 3  
A0A0AF691\_NEIME [5] gbaA 43 0 5 12 3  
A0A1V3SLY8\_NEIME 81 1 6 0 3  
A0A0U1RK35\_NEIMA NMA1979 23 3 0 0 3  
A0A0AF688\_NEIME (+17) rpsQ 10 3 1 6 2  
A0A0AF4W7\_NEIME (+17) A0A0AF4W7\_NEIME (+17) 18 2 2 9 2  
A0A0AF634\_NEIME (+16) rplV 12 10 0 0 2  
A0A0E0TMT1\_NEIMN (+7) rmpJ 4 5 0 0 6  
A0A0AF4AY7\_NEIME (+18) fbz 41 17 3 7 2  
A0A0Y6TGX3\_NEIME [6] dapD 29 0 8 11 2  
E0NK92\_NEIME rlmB 27 0 0 0 2  
A0A0AF458\_NEIME [17] rplJ 18 4 1 4 2  
E0NTB0\_NEIME [2] HMPREF0602\_0390 61 5 0 1 2  
E0NTV4\_NEIME [5] lysC 44 2 6 11 2  
CARB\_NEIMB [7] carB\_NEIMB [7] 117 0 3 16 2  
ICSB\_NEIME [4] icsB 45 0 22 5 3  
A0A0AF772\_NEIME [5] N875\_09290 114 14 0 0 2  
glk\_2 35 0 4 5 2  
A0A0E0TRV2\_NEIMN [4] NMNBZ0533\_1736 67 10 5 2 2  
E0NMV1\_NEIMH [3] E0NMV1\_NEIMH [3] 76 1 13 7 2  
bame 15 10 8 5 5  
A0A0AF6D7\_NEIME [22] N875\_07960 12 0 0 1 2  
A0A0AF925\_NEIME [15] N875\_04710 22 11 0 3 2  
A0A0Y5FM4\_NEIME (+11) A0A0Y5FM4\_NEIME (+11) 18 2 2 9 2  
erpA 12 3 3 3 2  
A0A0E0TS6\_NEIMN [16] ssb 19 2 3 5 2  
N875\_07400 46 9 0 0 1  
rbaB\_1 243 3 4 8 2  
J8WEJ7\_NEIME lbpB 82 0 0 2 2  
Q0R583\_NEIME 2 0 0 0 2  
A0A0AF691\_NEIME (+12) N875\_10440 19 2 12 22 2  
A0A0AF4F1\_NEIME (+2) hisA 26 0 4 1 1  
REVERSE\_A0A0H5QSR9\_NEIME-DECOY (+2) 28 0 0 0 1  
rpsN 12 12 0 7 1  
A0A0G4BXC1\_NEIME (+7) glnA 44 13 0 10 1  
rmpJ 5 13 0 0 1  
N875\_10110 18 0 4 3 1  
REVERSE\_A0Y1NEIM-DECOY (+1) acpP 49 1 0 0 1  
rmmB 30 0 10 8 1  
N875\_07730 43 2 6 10 1  
J8WTP2\_NEIME [7] rplQ 14 19 0 0 1  
CS6AQ2\_NEIME [4] rIT 9 11 0 0 1  
N875\_10115 11 1 7 5 1  
E0M2X5\_NEIMH [2] pgdB 24 0 4 1 1  
R0TXR8\_NEIME 51 0 0 0 1  
A0A0U1IRB2\_NEIMA [3] NMA1011 37 13 0 0 1  
gyrA 102 0 0 6 1  
rbc 38 0 1 6 1  
feaA 34 0 0 0 1

Cluster of FHbp (Fragment) OS=Neisseria meningitidis GN=fHbp PE=4 SV=1 (REVERSE\_W6AQX7\_NEIME-DECOY)  
Cluster of Fumarate hydratase class II OS=Neisseria meningitidis LNP21362 GN=aspA PE=3 SV=1 (A0A0A8F7U0\_NEIME)  
Cluster of Glucose-6-phosphate 1-dehydrogenase OS=Neisseria meningitidis GN=zwf PE=3 SV=1 (A0A0Y6G459\_NEIME)  
Cluster of IgA-specific serine endopeptidase autotransporter OS=Neisseria meningitidis 81858 GN=iga PE=4 SV=1 (REVERSE\_ROWOC4\_NEIME-DECOY)  
Cluster of Na(+)-translocating NADH-quinone reductase subunit C OS=Neisseria meningitidis LNP21362 GN=nqrC PE=3 SV=1 (A0A0A8F8T4\_NEIME)  
Cluster of Outer-membrane lipoprotein carrier protein OS=Neisseria meningitidis GN=ioiA PE=3 SV=1 (XSEF49\_NEIME)  
Cluster of Periplasmic protein OS=Neisseria meningitidis GN=ERS514729\_00530 PE=4 SV=1 (A0A0Y5STW7\_NEIME)  
Cluster of Phosphoribosylglycinamide formyltransferase OS=Neisseria meningitidis LNP21362 GN=N875\_10555 PE=4 SV=1 (A0A0A8F7P6\_NEIME)  
Cluster of Prolyl oligopeptidase family protein OS=Neisseria meningitidis 81858 GN=NMB1858\_0911 PE=4 SV=1 (R0LU4U3\_NEIME)  
Cluster of Putative phospholipase A1 OS=Neisseria meningitidis M0579 GN=M0579\_00529 PE=4 SV=1 (A0A0G4BWG3\_NEIME)  
Cluster of Succinate dehydrogenase flavoprotein subunit OS=Neisseria meningitidis serogroup C / serotype 2a (strain ATCC 700532 / DSM 15464 / FAM18) GN=sdhA PE=3 SV=1 (A1KTL8\_NEIMF)  
Cluster of Threonine synthase OS=Neisseria meningitidis serogroup B (strain NZ-05/33) GN=thrC PE=4 SV=1 (A0A0E0TQR4\_NEIMN)  
Cluster of Transcription elongation factor GnaA OS=Neisseria meningitidis serogroup B GN=gnaA PE=3 SV=1 (A0A0H5QFJ9\_NEIMI)  
Cluster of Transcription termination/antitermination protein NusG OS=Neisseria meningitidis GN=nusG PE=3 SV=1 (A0A1V3SNN1\_NEIME)  
Cluster of Uncharacterized protein OS=Neisseria meningitidis alpha 153 GN=NME\_1515 PE=4 SV=1 (REVERSE\_C6SDZ7\_NEIME-DECOY)  
Cluster of Uncharacterized protein OS=Neisseria meningitidis serogroup B PE=4 SV=1 (A0A0H5QT51\_NEIMI)  
Lactoferrin-binding protein B OS=Neisseria meningitidis serogroup B (strain NZ-05/33) GN=lfbpB PE=4 SV=1  
Nucleoid-associated protein NMBNZ0533\_1423 OS=Neisseria meningitidis serogroup B (strain NZ-05/33) GN=NMBNZ0533\_1423 PE=3 SV=1  
Transcriptional regulator OS=Neisseria meningitidis LNP21362 GN=N875\_00875 PE=3 SV=1  
Uncharacterized protein OS=Neisseria meningitidis alpha 153 GN=NME\_0322 PE=4 SV=1  
UPF0237 protein N875\_08665 OS=Neisseria meningitidis LNP21362 GN=N875\_08665 PE=3 SV=1

|                                |                      |     |    |   |   |   |
|--------------------------------|----------------------|-----|----|---|---|---|
| REVERSE_W6AQX7_NEIME-DECOY [2] | fHbp                 | 18  | 0  | 1 | 0 | 1 |
| A0A0A8F7U0_NEIME [3]           | aspA                 | 49  | 1  | 0 | 2 | 1 |
| A0A0Y6G459_NEIME               | zwf                  | 54  | 0  | 2 | 2 | 1 |
| REVERSE_ROWOC4_NEIME-DECOY     | iga                  | 171 | 0  | 0 | 1 | 1 |
| A0A0A8F8T4_NEIME [10]          | nqrC                 | 28  | 8  | 0 | 0 | 1 |
| XSEF49_NEIME [3]               | ioiA                 | 28  | 0  | 2 | 7 | 1 |
| ERS514729_00530                | ERS514729_00530      | 30  | 4  | 2 | 4 | 1 |
| N875_10555                     | N875_10555           | 30  | 34 | 0 | 2 | 1 |
| NMB1858_0911                   | NMB1858_0911         | 23  | 0  | 1 | 2 | 1 |
| M0579_00529                    | M0579_00529          | 42  | 0  | 0 | 0 | 1 |
| A1KTL8_NEIMF [3]               | sdhA                 | 65  | 6  | 0 | 4 | 1 |
| A0A0E0TQR4_NEIMN [2]           | thrC                 | 52  | 0  | 4 | 4 | 1 |
| R0LU4U3_NEIME                  | gnaA                 | 19  | 0  | 4 | 6 | 1 |
| A0A0G4BWG3_NEIME [7]           | nusG                 | 21  | 3  | 3 | 5 | 1 |
| A0A1V3SNN1_NEIME [13]          | NME_1515             | 6   | 0  | 0 | 0 | 1 |
| REVERSE_C6SDZ7_NEIME-DECOY [2] | A0A0H5QT51_NEIMI [6] | 24  | 0  | 3 | 5 | 1 |
| A0A0E0TSR5_NEIMN               | lfbpB                | 78  | 1  | 0 | 3 | 1 |
| A0A0E0TSH6_NEIMN (+16)         | NMBNZ0533_1423       | 12  | 0  | 0 | 1 | 1 |
| A0A0A8F318_NEIME (+16)         | N875_00875           | 9   | 4  | 2 | 6 | 1 |
| C6SAL1_NEIME                   | NME_0322             | 6   | 1  | 1 | 1 | 1 |
| A0A0A8F773_NEIME (+19)         | N875_08665           | 10  | 0  | 2 | 2 | 1 |
